# Supplementary figures and images for: Delicate Comparison of the Central and Non-central Lyapunov Ratios with Applications to the Berry–Esseen Inequality for Compound Poisson Distributions
Source: Preprints.org preprint supplement (doi:10.20944/preprints202212.0474.v1), 2022-12-26

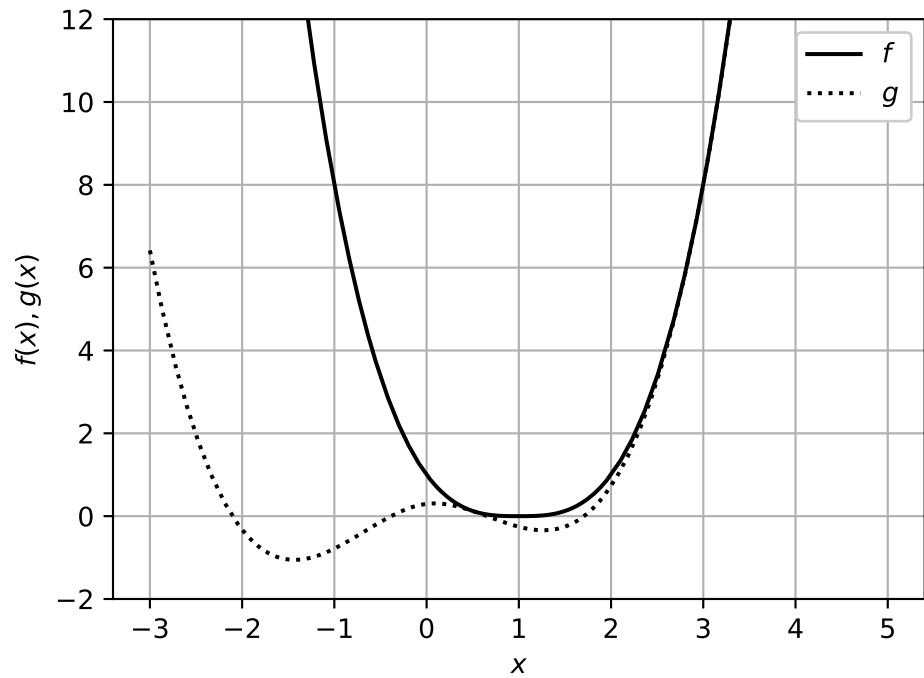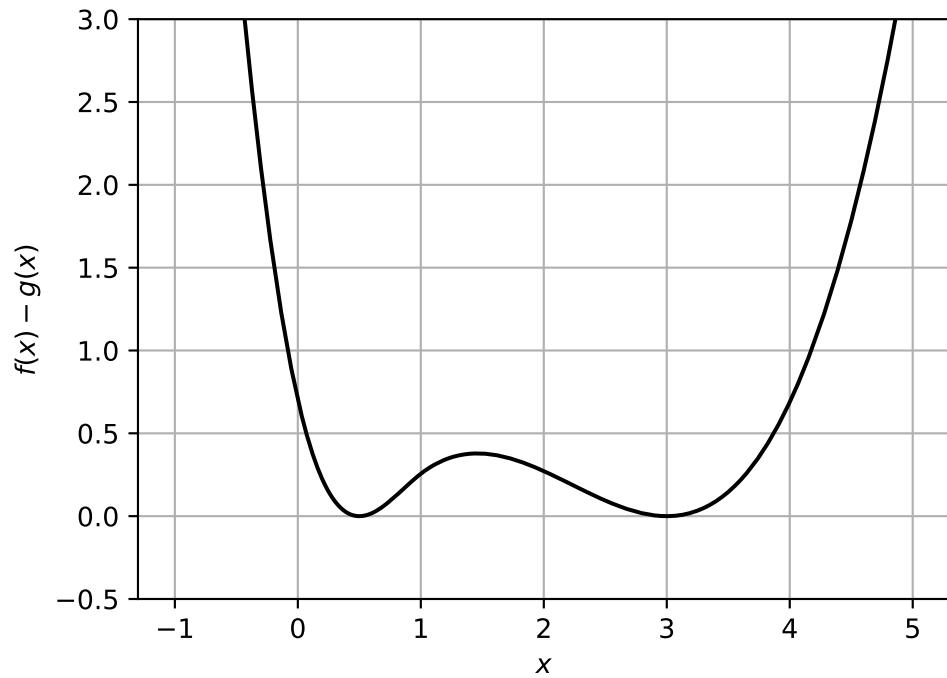

Supplement: Supplementary file 1 [file supplementary]

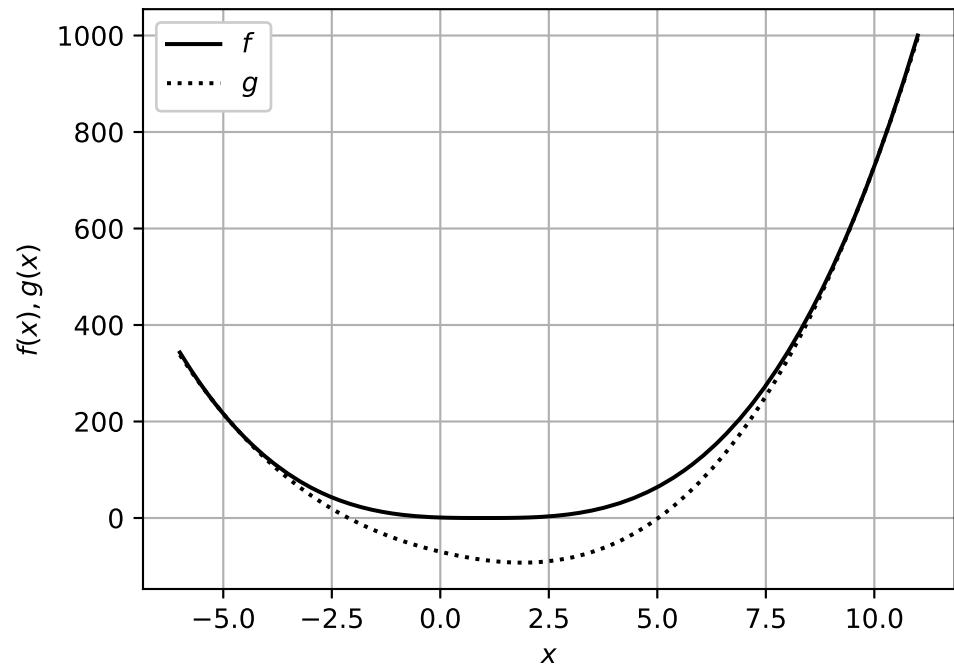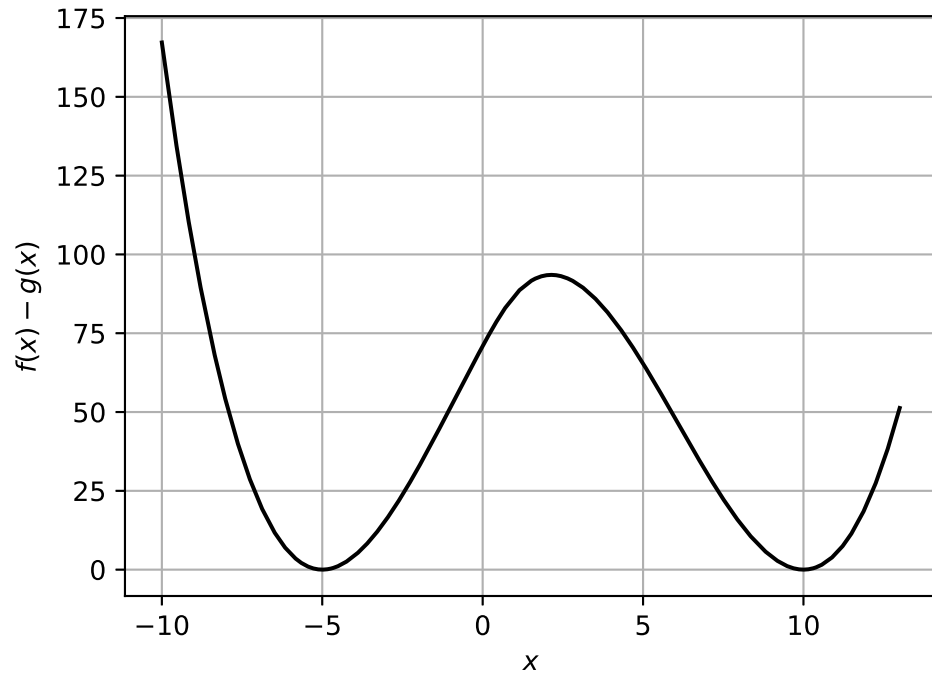

Supplement: Supplementary file 2 [file supplementary]

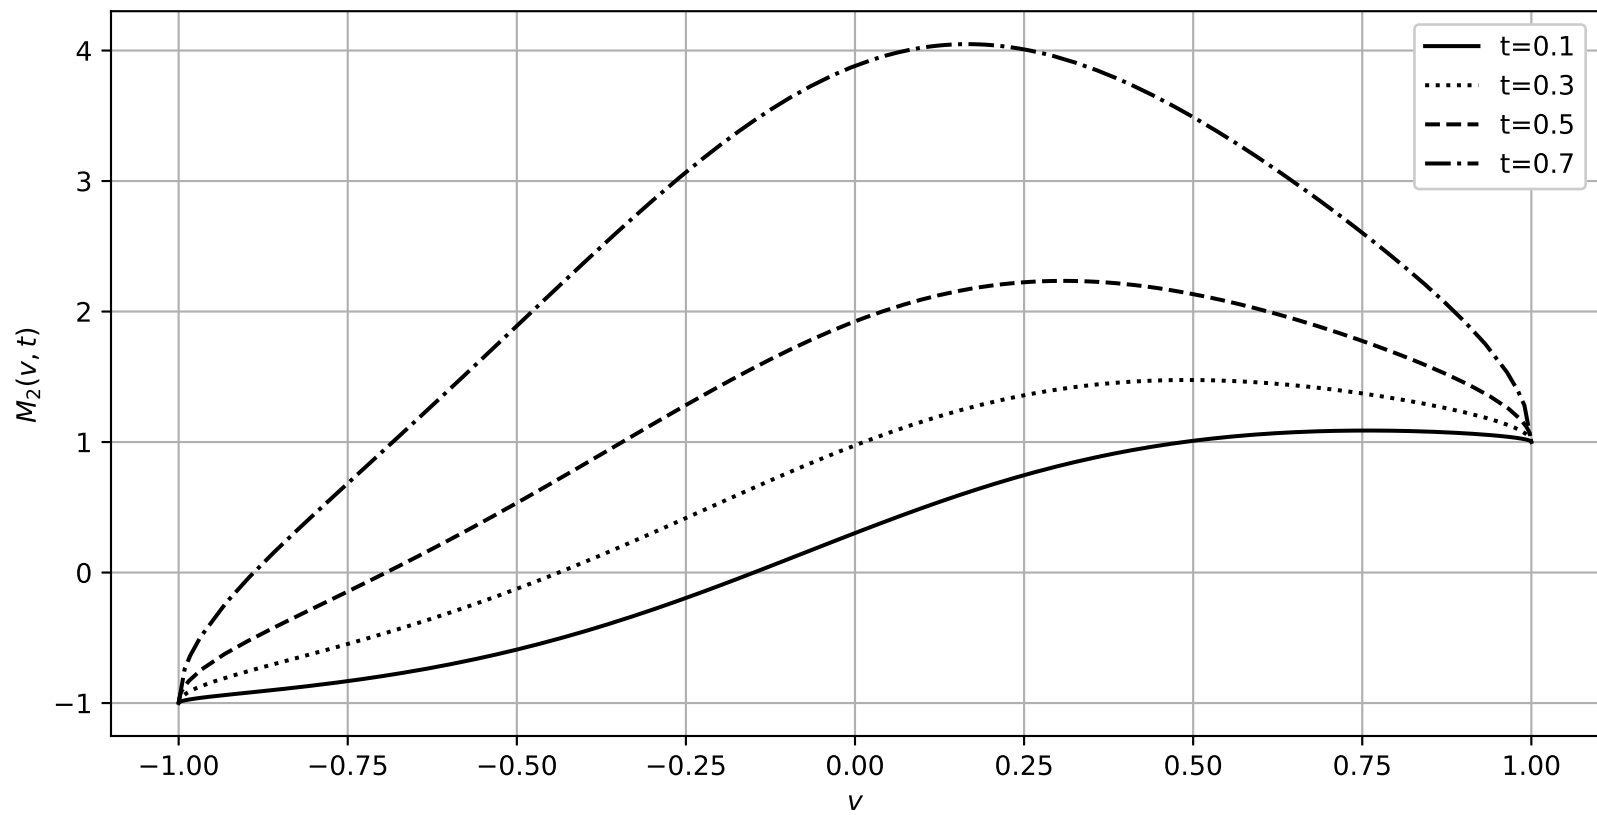

Supplement: Supplementary file 4 [file supplementary]

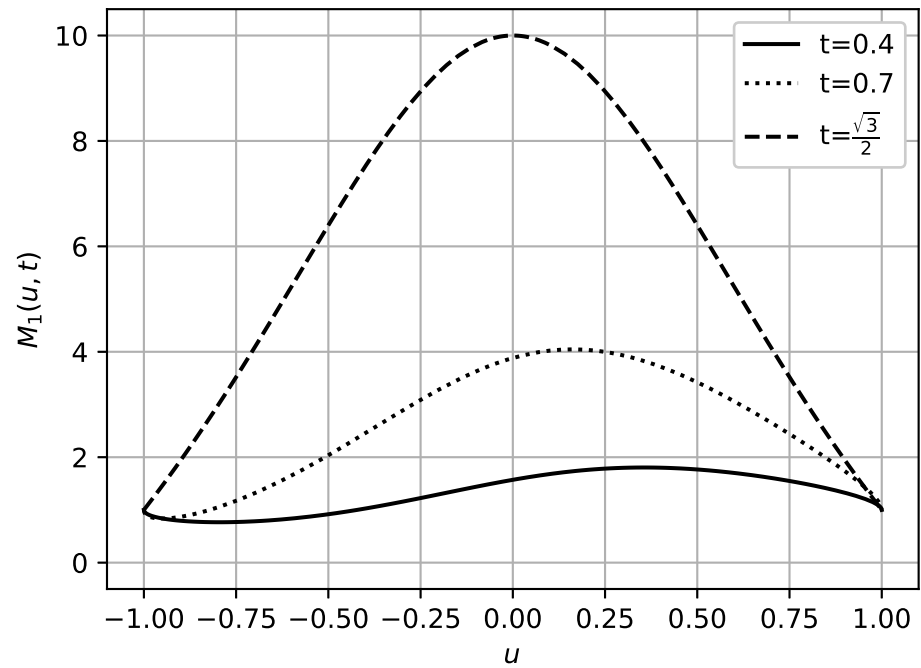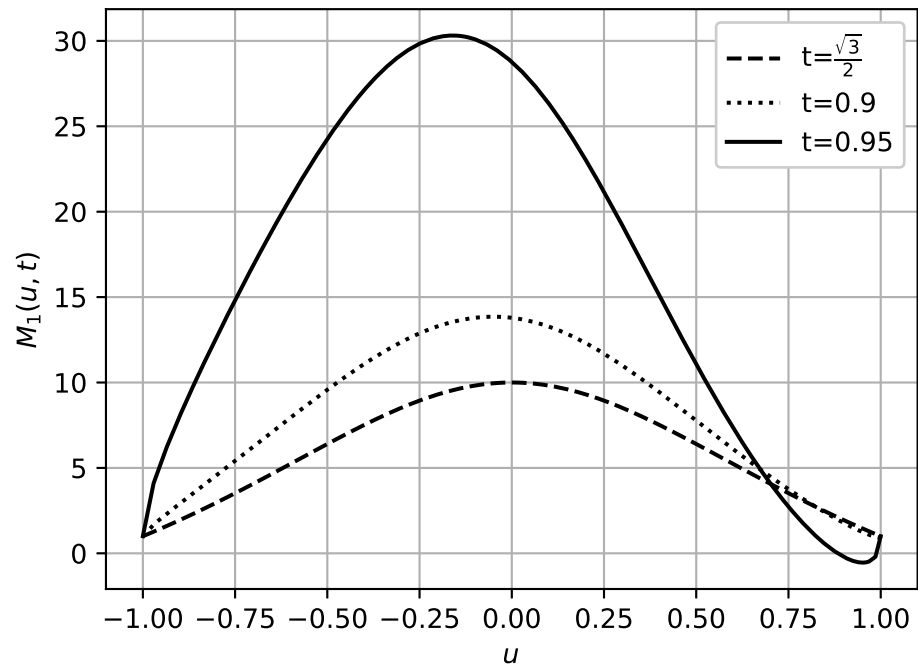

Supplement: Supplementary file 5 [file supplementary]

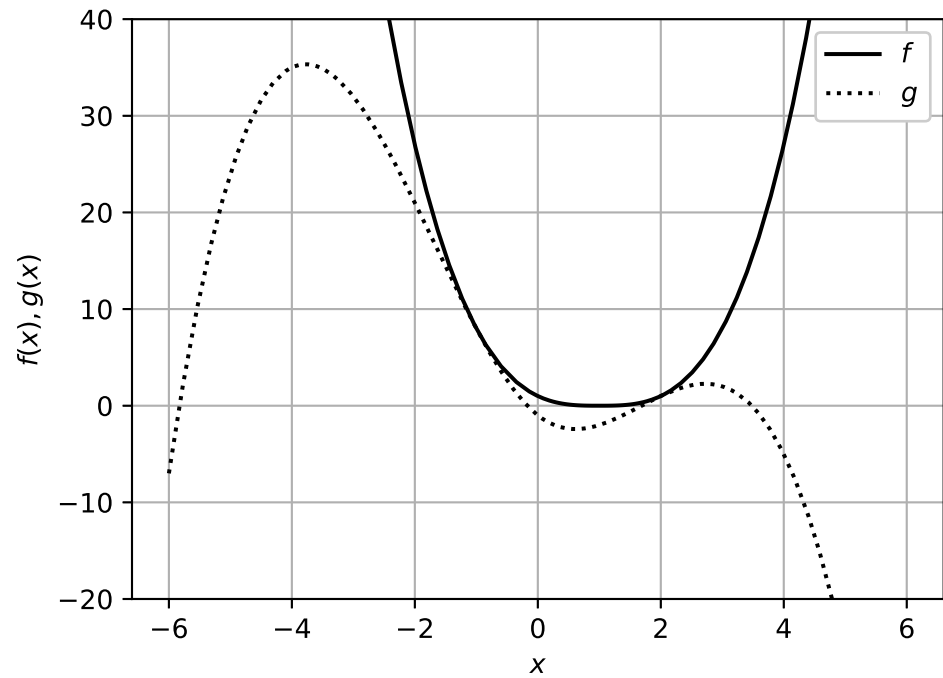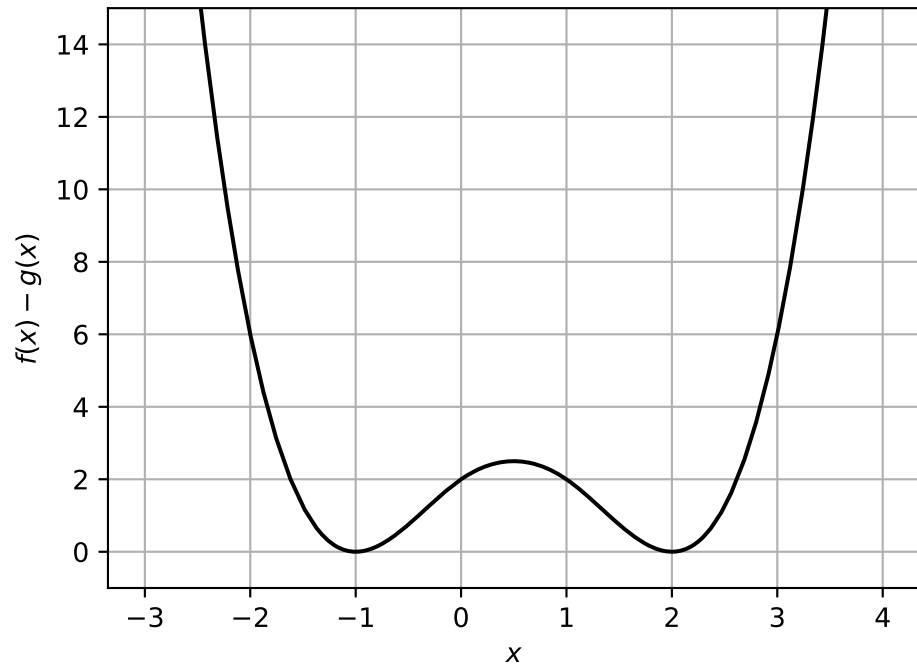

Supplement: Supplementary file 6 [file supplementary]

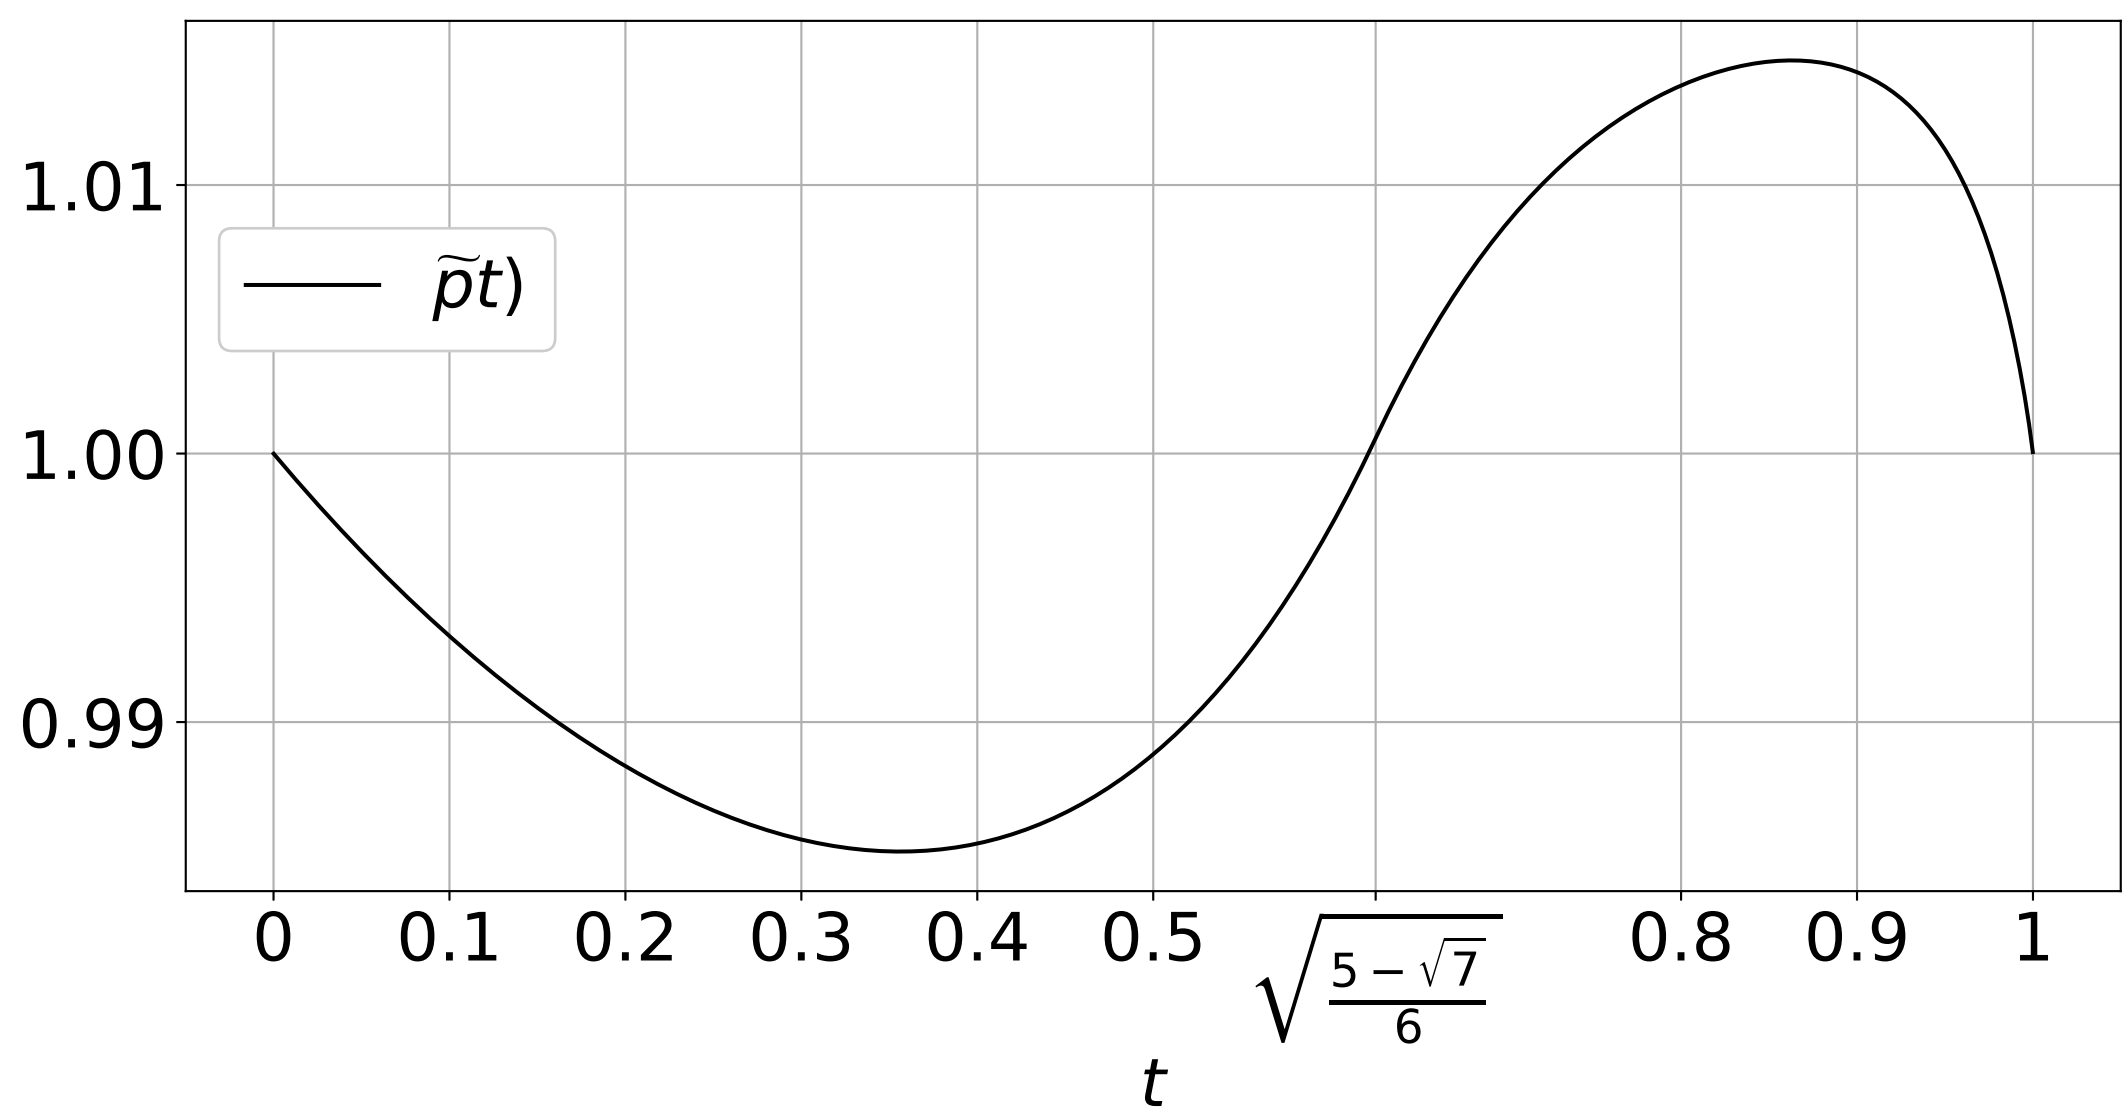

Supplement: Supplementary file 7 [file supplementary]

$$\frac{\sqrt{17+7\sqrt{7}}}{4} = 1.5144\dots$$

$$= 1.4899\dots$$

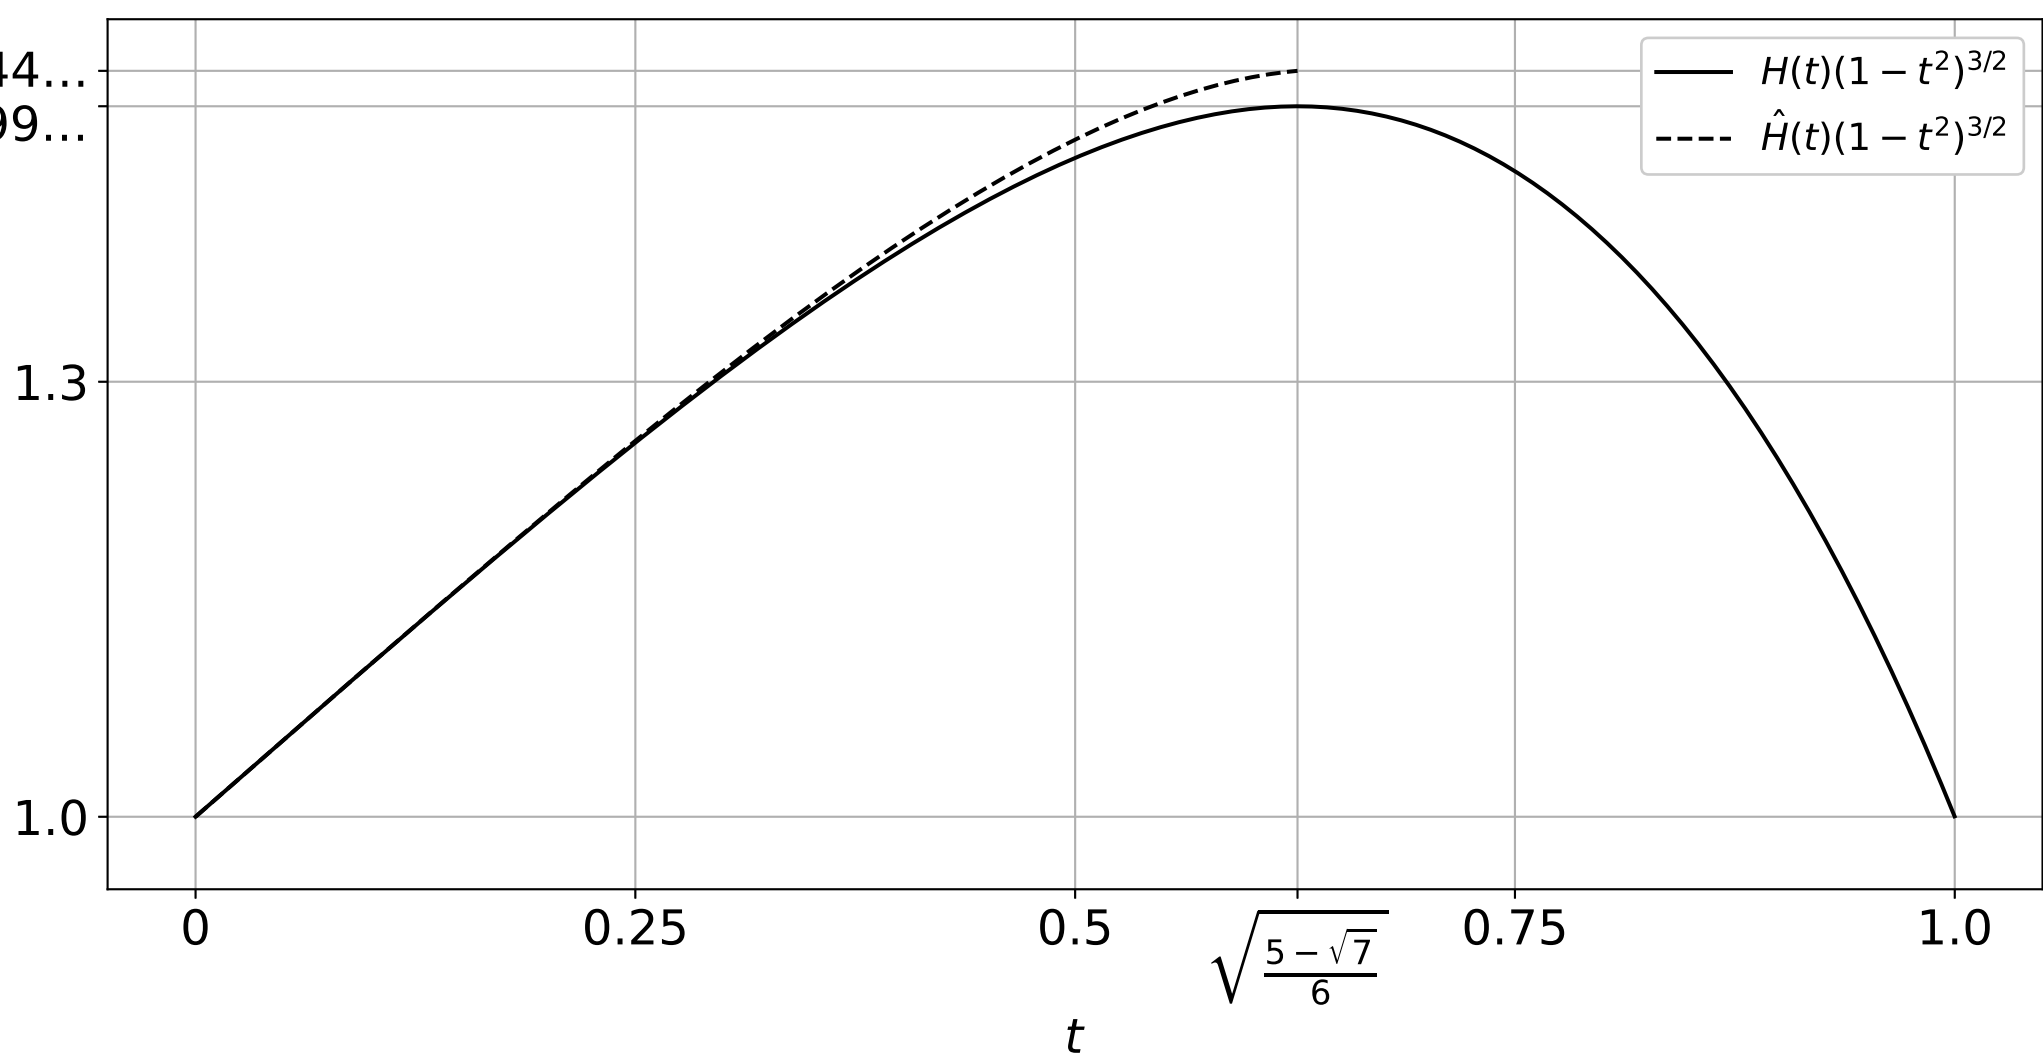

Supplement: Supplementary file 8 [file supplementary]

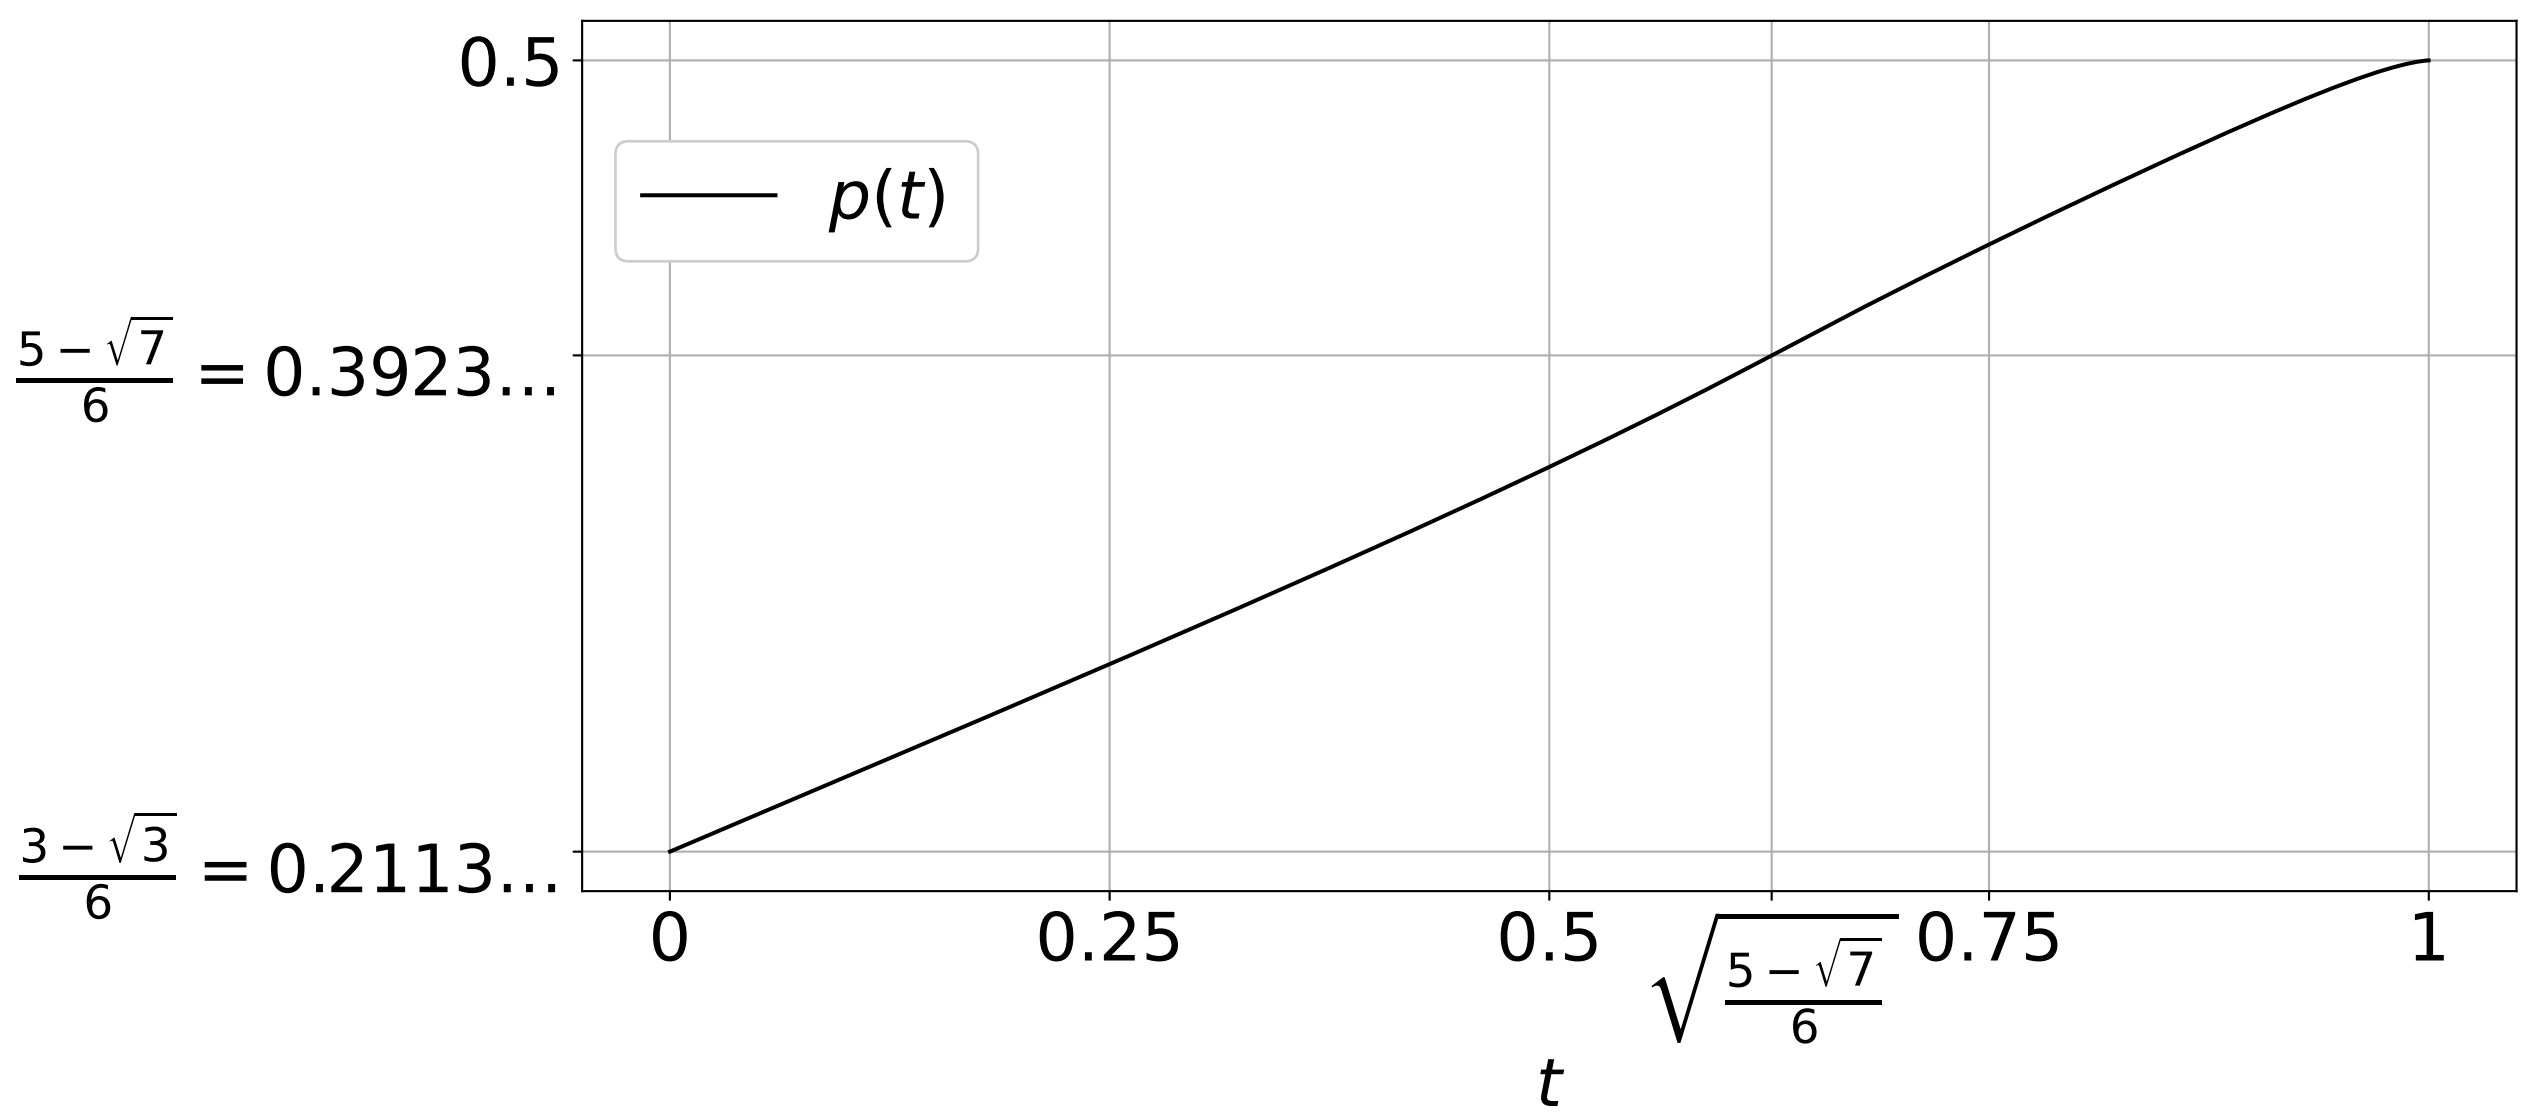

Supplement: Supplementary file 9 [file supplementary]

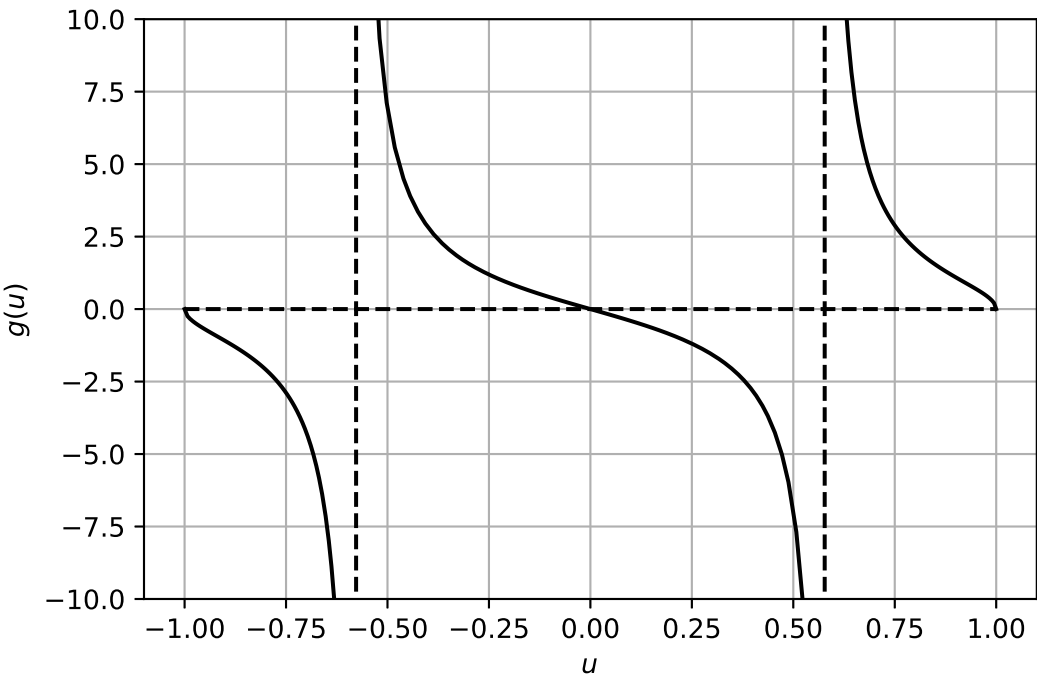

Supplement: Supplementary file 10 [file supplementary]
